# Supplementary material
Source: Springer Nature journal article supplement (https://www.springermedizin.de/resource/supplementary/12916_2013_899_MOESM5_ESM.pdf/9598782)

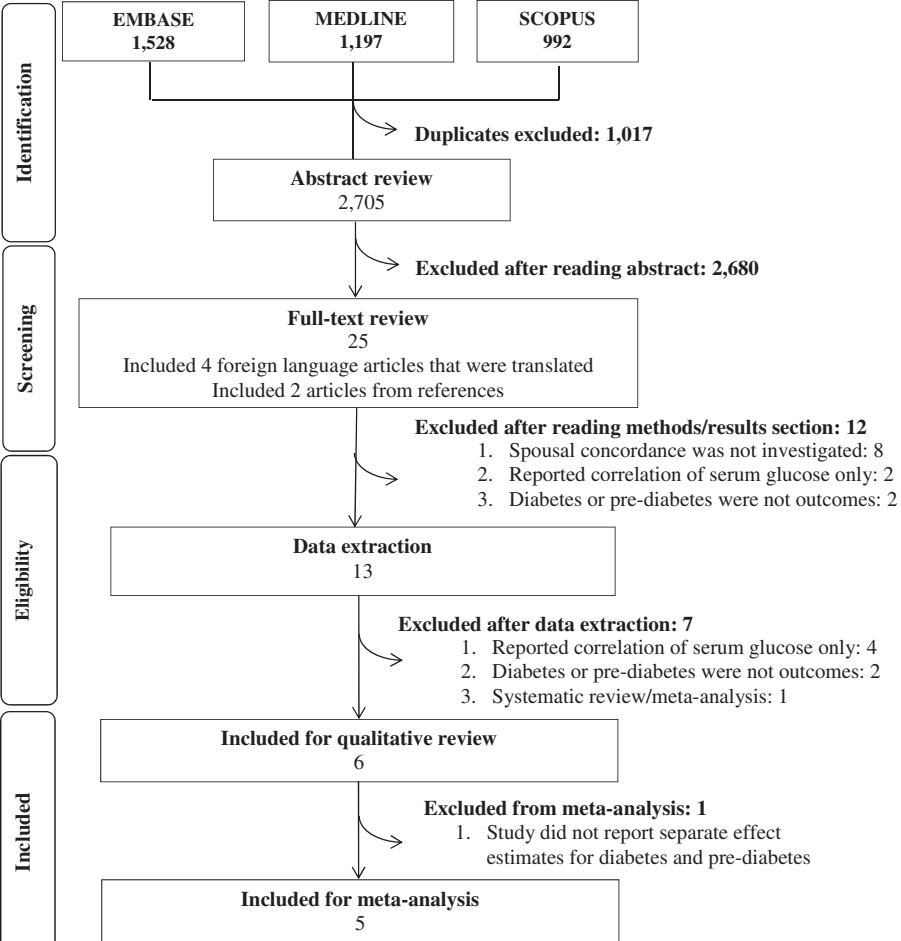

Supplement: MOESM5 [file 9598782]
